# Supplementary material for: Amyloid-β accumulation in human astrocytes induces mitochondrial disruption and changed energy metabolism
Source: Springer Nature journal article supplement (doi:10.1186/s12974-023-02722-z), 2023-02-20
Supplement: MOESM1 [file 12974_2023_2722_MOESM1_ESM.pdf]

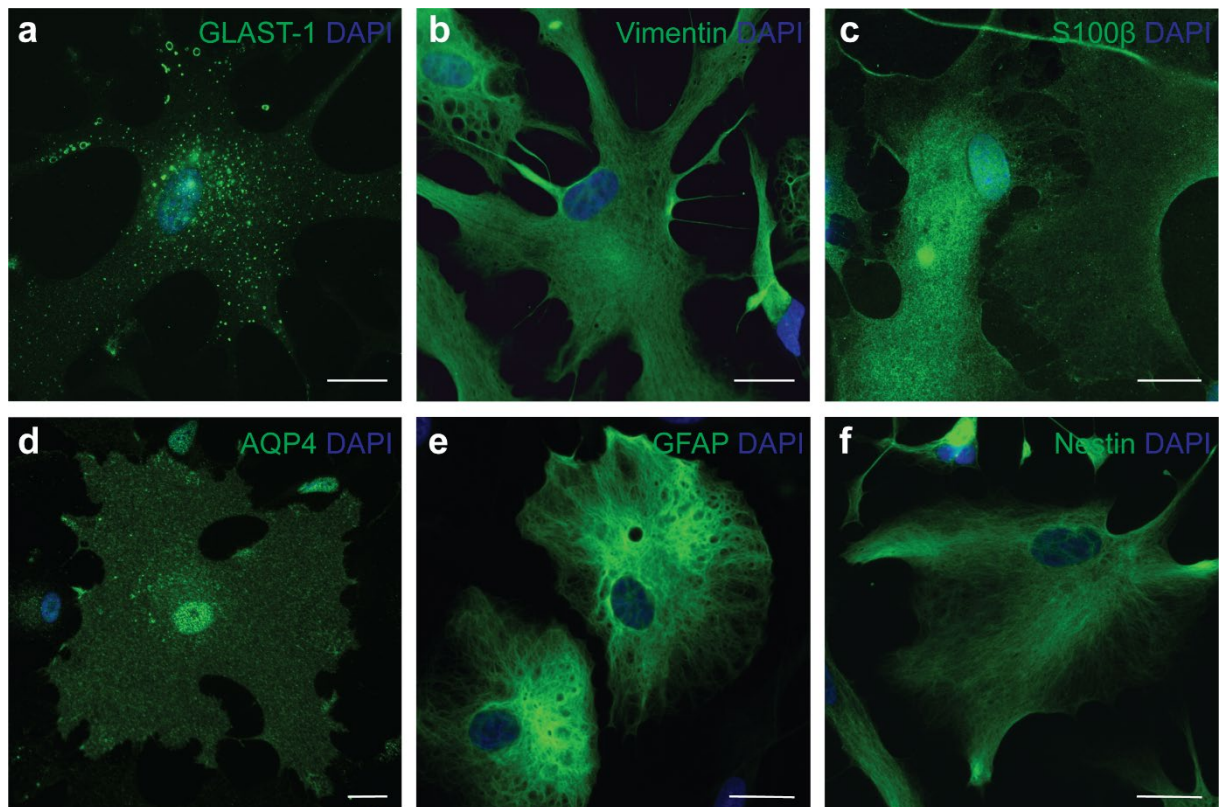

**Additional file 1. Astrocytic markers.** hiPSC-derived astrocytes were stained with DAPI (blue) and the astrocytic markers: GLAST-1 (A), Vimentin (B) S100 $\beta$  (C), AQP4 (D), GFAP (E), and Nestin (F). Scale bar: 20  $\mu$ m.
